# Supplementary material
Source: PubMed Central journal article supplement (PMC5339830)
Supplement: cr2016131x6.pdf [file cr2016131x6.pdf]

**Supplementary information, Figures S1-S2, Table S1 and Data S1** This file includes: Supplementary information, Figures S1-S2, Supplementary information, Table S1, and Supplementary information, Data S1 Materials and Methods.

**A**

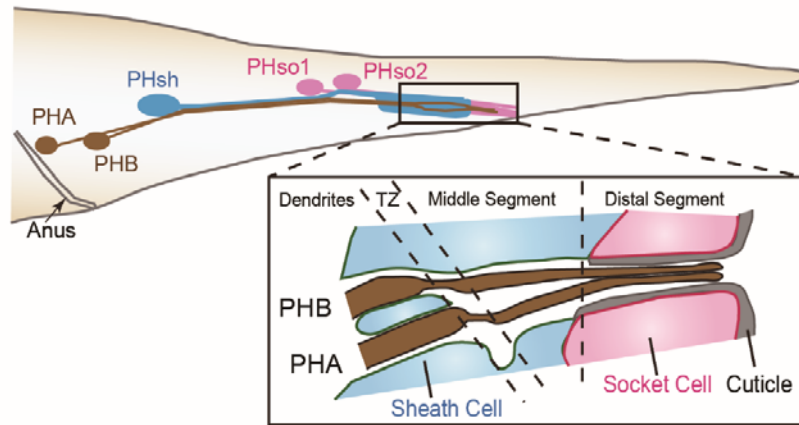

**B**

| Gene          | Allele          | Homology<br>( <i>H. sapiens</i> ) | Dye filling defect (%) |         | N   |
|---------------|-----------------|-----------------------------------|------------------------|---------|-----|
|               |                 |                                   | amphid                 | phasmid |     |
| <i>wsp-1a</i> | <i>gm324</i>    | N-WASP                            | 0                      | 55      | 390 |
| <i>wsp-1b</i> | <i>gk206830</i> | N-WASP                            | 0                      | 7       | 520 |
| <i>unc-34</i> | <i>e315</i>     | VASP                              | 0                      | 0       | 224 |
| <i>unc-60</i> | <i>e723</i>     | cofilin                           | 0                      | 0       | 342 |
| <i>dbn-1</i>  | <i>ok925</i>    | mABP1                             | 0                      | 0       | 289 |

**C**

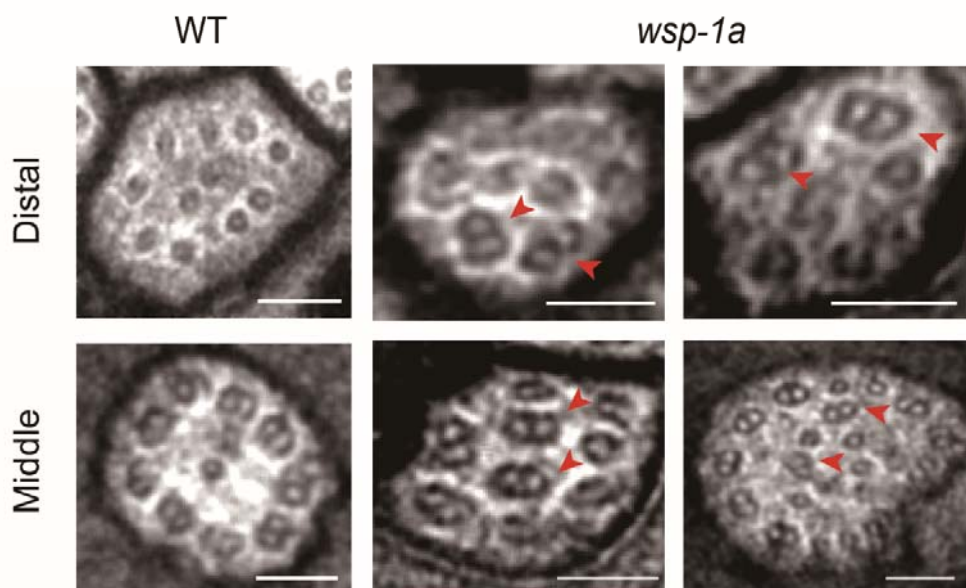

**Supplementary information, Figure S1. The *C. elegans* phasmid and actin regulators that are involved in ciliogenesis.**

**(A)** Schematic of the *C. elegans* phasmid. Top: two glial cells including: the socket cell (PHso, pink) and the sheath cell (PHsh, blue). Each phasmid has 2 neurons (PHA and PHB, brown). The area in the rectangle is enlarged at the bottom. Bottom: dendrite endings develop cilia that enter the sensory channel formed by the glial cells at the tip. TZ: transition zone. Based on Perkins et al., 1986<sup>6</sup>. **(B)** The dye-filling screen of mutants with defective actin regulators. **(C)** The axonemal microtubule structure of the ciliary middle or distal segments. Red Arrowhead: doublet microtubules. Scale bar, 100 nm.

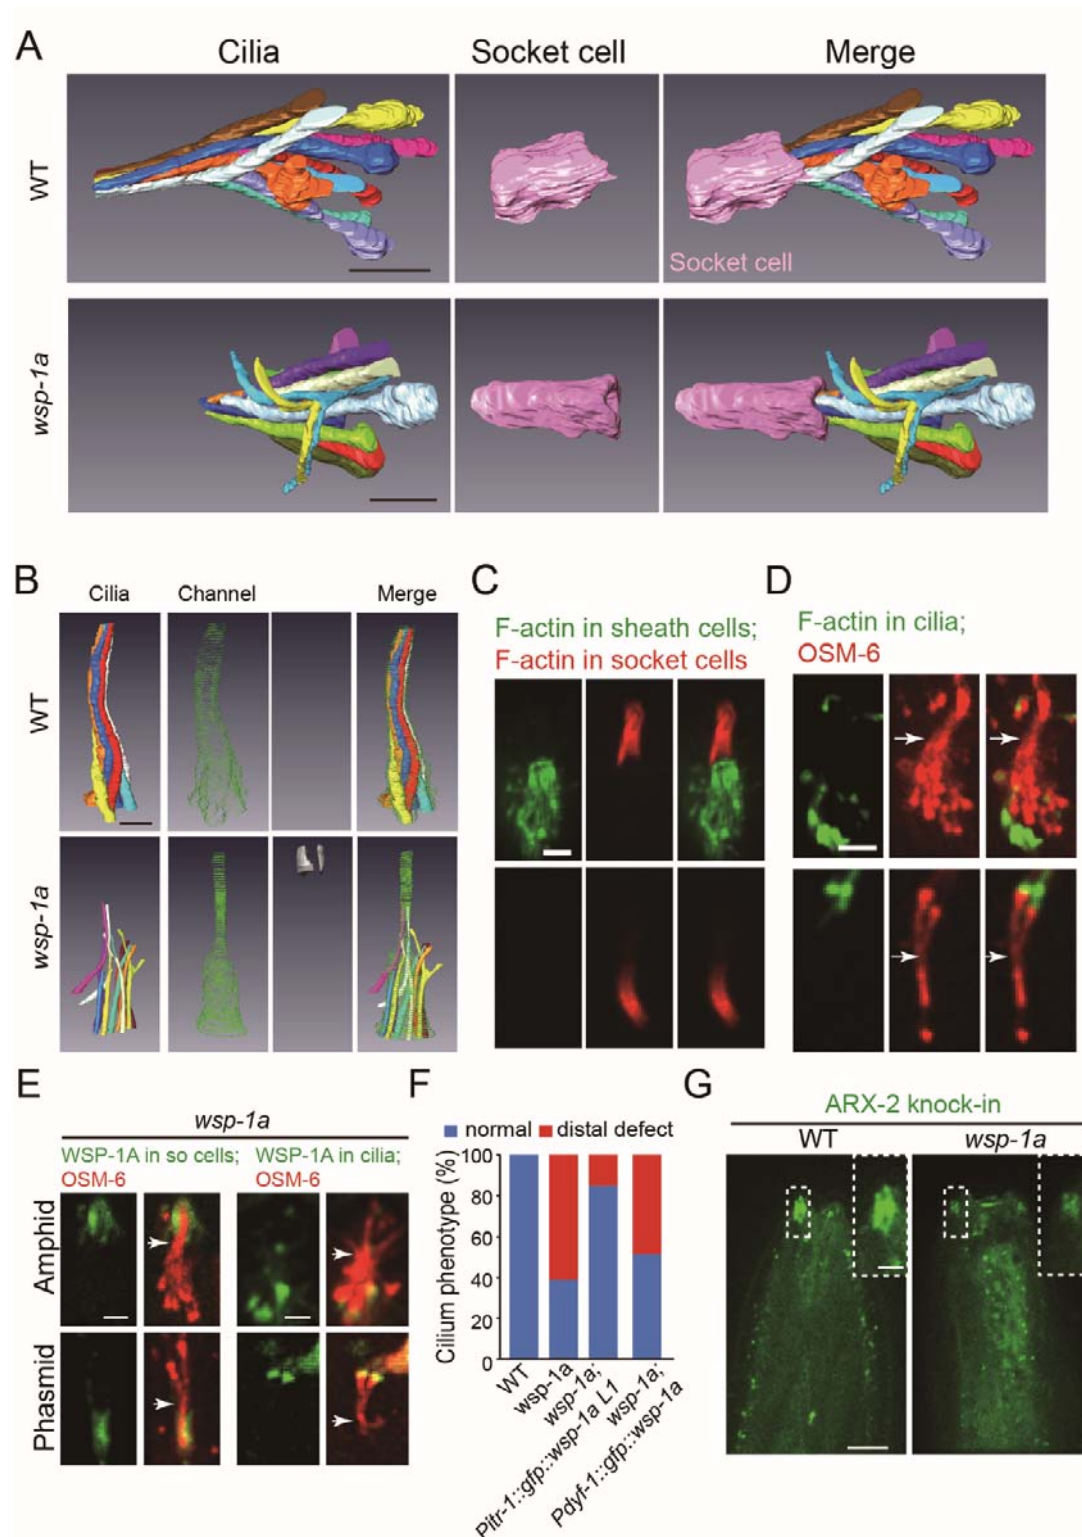

**Supplementary information, Figure S2. WSP-1A regulates the morphology of the socket cells.**

(A) Side views of a 3D reconstruction from the aligned longitudinal section FIB-SEM images show trajectories of cilia and the socket cells in WT and *wsp-1a* mutants.

Colors: cilia. Pink: socket cells. Scale bar, 2  $\mu\text{m}$ . **(B)** Side views of a 3D reconstruction from the aligned cross section FIB-SEM images show trajectories of cilia and the channel from the distal tip to the transition zone in WT and *wsp-1a* mutants. Colors: cilia. Grey: highly electron dense material. Green: channel. Scale bar, 1  $\mu\text{m}$ . **(C)** Expression of F-actin marker *gfp::Utrophin* in the socket cells (*Pitr-1* promoter, red) and the amphid sheath cells (*Pvap-1* promoter, green). **(D)** Expression of F-actin marker *gfp::Utrophin (CH)* (green) in cilia (*Pdyf-1* promoter). Cilia were labeled with OSM-6::mCherry (red). Arrows indicate the boundaries of the ciliary distal and middle segments. **(E)** Fluorescence images of GFP::WSP-1A in socket (so) cells (left) or cilia (right) in *wsp-1a* mutants. Arrows indicate the middle and distal segment boundaries. **(F)** Quantifications of **(E)** cilium phenotype. n = 40-50. **(G)** Localization of ARX-2 (green) in the amphid in WT or *wsp-1a* mutant animals. Scale bar, 5  $\mu\text{m}$ . Insert box, ARX-2 in the socket cell. Scale bar, 2  $\mu\text{m}$ .

### Supplementary information, Table S1A. Primers for Molecular analysis

| Gene                            | CRISPR-Cas9 targets (PAM) | Primers (For: forward; Rev: reverse)                                |
|---------------------------------|---------------------------|---------------------------------------------------------------------|
| <i>arx-2</i><br><i>knock-in</i> | GCAAGATGTATGGCCAAACTTGG   | For :ATAGAAGCCCCACCAAGCCG<br>Rev: AACGTTTGAATGAGAGTGGG              |
| <i>wsp-1</i><br><i>knock-in</i> | CGGATCATCAAACATATGTGG     | For: CCCTGAATTAATACTCTCTCTCTGCC<br>Rev: CATCTCATTTTCTTGTGAATTGAGCTC |

### Supplementary information, Table S1B. Plasmids and Primers in This Study

| Plasmid Name                                            | Primer 5'                                      | Primer 3'                                            | Notes                                                                                                                                   |
|---------------------------------------------------------|------------------------------------------------|------------------------------------------------------|-----------------------------------------------------------------------------------------------------------------------------------------|
| pDD162- <i>Peft-3::Cas9+PU6::arx-2</i> -<br>knock-in-sg | ATGTATGGCCAAAC<br>TGTTTATAGACTAG<br>AAATAGCAAG | AGTTTGGCCATACATCT<br>TGCAAGACATCTCGCA<br>ATAGG       | PCR from pDD162- <i>Peft-3::Cas9+</i><br><i>PU6::Empty sgRNA</i>                                                                        |
| pDD162- <i>Peft-3::Cas9+PU6::wsp-1</i> -<br>knock-in-sg | CATCAAACATATG<br>TGTTTATAGACTAG<br>AAATAGCAAG  | ACATATGTTTTGATGAT<br>CCGCAAGACATCTCGC<br>AATAGG      | PCR from pDD162- <i>Peft-3::Cas9+</i><br><i>PU6::Empty sgRNA</i>                                                                        |
| pPD95.77- <i>arx-2::gfp</i><br>knock-in template        | GAACTATACAAATA<br>GATATTGTGACTTT<br>ATTTTCGTG  | GAAGAGTAATTGGACA<br>ATTATCTAGAGGTAGG<br>CGG          | The 3'arm sequences were amplified from N2 and cloned into pPD95.77- <i>arx-2-5' arm::GFP</i> via In-Fusion Advantage PCR Cloning Kit.  |
| pPD95.77- <i>arx-2-5' arm::GFP</i>                      | GTACCGGTAGAAA<br>AAGAAATACTGAC<br>GCGTTCCAG    | ACCAAGCTTGGGTCTA<br>GCTTTGATTCCAAGCT<br>TAGCCATGCAGC | The 5'arm sequences were amplified from N2 and cloned into pPD95.77 via In-Fusion Advantage PCR Cloning Kit.                            |
| pPD95.77- <i>wsp-1-5'arm::GFP</i>                       | GTACCGGTAGAAA<br>AAAATTCAATGCTG<br>CAAGCGCG    | TTCTCCTTTACTCATATG<br>TTTTGATGATCCGAGG               | The 5' arm sequences were amplified from N2 and cloned into pPD95.77 via In-Fusion Advantage PCR Cloning Kit.                           |
| pPD95.77- <i>gfp::wsp-1</i><br>knock-in template        | CCCAAGCTTGGTA<br>CCATGTCGGTATAT<br>CCTCCAC     | GAAGAGTAATTGGACC<br>TCTCAATTCATCGGTGC<br>TC          | The 3' arm sequences were amplified from N2 and cloned into pPD95.77- <i>wsp-1-5' arm::GFP</i> via In-Fusion Advantage PCR Cloning Kit. |

|                                                    |                                                |                                                |                                                                                                                                |
|----------------------------------------------------|------------------------------------------------|------------------------------------------------|--------------------------------------------------------------------------------------------------------------------------------|
| pDONR- <i>Pdyf-1::gfp::Utrophin::unc-54 3'utr</i>  | GGAAGTGGTAGCG<br>GTGCCAAGTATGG<br>AGAACATGAAGC | GAAGAGTAATTGGACT<br>TAGTCTATGGTGACTTG<br>CTGAG | Utrophin was amplified and cloned into pDONR- <i>unc-54 3'utr</i> via In-Fusion Advantage PCR cloning kit                      |
| pDONR- <i>Pvap-1::gfp::Utrophin::unc-54 3'utr</i>  | cctactgtagaggagat<br>gttgagc                   | ctgtgaaaatgaacgcacgc<br>ctgc                   | <i>Pvap-1</i> was amplified and cloned into pDONR- <i>gfp::Utrophin::unc-54 3'utr</i> via In-Fusion Advantage PCR cloning kit  |
| pPD95.77- <i>Pvap-1::gfp::wsp-1a::unc-54 3'utr</i> | cctactgtagaggagat<br>gttgagc                   | ctgtgaaaatgaacgcacgc<br>ctgc                   | <i>Pvap-1</i> was amplified and cloned into pPD95.77- <i>gfp::wsp-1a::unc-54 3'utr</i> via In-Fusion Advantage PCR cloning kit |
| pPD95.77- <i>Pitr-1::gfp::wsp-1a::unc-54 3'utr</i> | CGTCCCCGAGCATT<br>ATGAATgtaag                  | GGCCGTCGTTTCGTTT<br>TCGTctg                    | <i>Pitr-1</i> was amplified and cloned into pPD95.77- <i>gfp::wsp-1a::unc-54 3'utr</i> via In-Fusion Advantage PCR cloning kit |

### Supplementary information, Table S1C. *C. elegans* Strains in this Study

| Strain name | Genotype                                             | Method         | Purpose                                    |
|-------------|------------------------------------------------------|----------------|--------------------------------------------|
| N2          | wild-type                                            |                |                                            |
| GOU2047     | <i>cas607 [arx-2::gfp knock-in]</i>                  | Microinjection | To visualize endogenous ARX-2              |
| GOU2049     | <i>cas723 [gfp::wsp-1 knock-in]</i>                  | Microinjection | To visualize endogenous WSP-1              |
| NG324       | <i>wsp-1a(gm324)</i>                                 | CGC            | <i>wsp-1a</i> mutant                       |
| VC20008     | <i>wsp-1b(gk206830)</i>                              | CGC            | <i>wsp-1b</i> mutant                       |
| CB315       | <i>unc-34 (e315)</i>                                 | CGC            | <i>unc-34</i> mutant                       |
| CB723       | <i>unc-60(e723)</i>                                  | CGC            | <i>unc-60</i> mutant                       |
| RB1004      | <i>dbn-1(ok925)</i>                                  | CGC            | <i>dbn-1</i> mutant                        |
| SP2101      | <i>mnIs17 [osm-6::gfp + unc-36(+)]</i>               | CGC            | To visualize cilia                         |
| GOU1757     | <i>casIs550[Pdyf-1::osm-6::mCherry]</i>              | Microinjection | To visualize cilia                         |
| GOU1929     | <i>wsp-1a(gm324); SP2101[Pdyf-1::osm-6::gfp]</i>     | Cross          | To visualize cilia in <i>wsp-1a</i> mutant |
| GOU1926     | <i>cas723 [gfp::wsp-1a knock-in]; casIs550[Pdyf-</i> | Cross          | To visualize cilia and                     |

|         |                                                                                                                                    |                |                                                             |
|---------|------------------------------------------------------------------------------------------------------------------------------------|----------------|-------------------------------------------------------------|
|         | <i>1::osm-6::mCherry]</i>                                                                                                          |                | WSP-1A                                                      |
| GOU1813 | <i>cas607 [arx-2::gfp knock-in]; casIs550[Pdyf-1::osm-6::mCherry]</i>                                                              | Cross          | To visualize cilia and ARX-2                                |
| GOU2278 | <i>casEX3401[Pitr-1::gfp::wsp-1a + Pdyf-1::osm-6::mCherry + Pegl-17::Myri::mCherry + Pegl-17::mCherry::his-24]; wsp-1a (gm324)</i> | Microinjection | To rescue <i>wsp-1a</i> mutant                              |
| GOU2279 | <i>casEX3402[Pdyf-1::gfp::wsp-1a + Pdyf-1::osm-6::mCherry + Pegl-17::Myri::mCherry + Pegl-17::mCherry::his-24]; wsp-1a (gm324)</i> | Microinjection | To rescue <i>wsp-1a</i> mutant                              |
| GOU2280 | <i>casEX6077 [Pdyf-1::gfp::utrophin + Pdyf-1::osm-6::mCherry + rol-6(su1006)]</i>                                                  | Microinjection | To visualize F-actin in cilia                               |
| GOU1967 | <i>casEX6085[Pvap-1::gfp::utrophin + Pitr-1::mCherry::utrophin + Pdyf-1::osm-6::mCherry]</i>                                       | Microinjection | To visualize F-actin in glial cells                         |
| GOU2285 | <i>casEX6085[Pvap-1::gfp::utrophin + Pitr-1::mCherry::utrophin + Pdyf-1::osm-6::mCherry]; wsp-1a(gm324)</i>                        | Cross          | To visualize F-actin in glial cells in <i>wsp-1a</i> mutant |

## **Supplementary information, Data S1 Materials and Methods**

### ***C. elegans* strains, genetics and DNA manipulations**

*C. elegans* strains were maintained on the nematode growth medium (NGM) plates seeded with *E. coli* OP50 at 20°C. CRISPR-Cas9-assisted conditional knock-in animals were produced as described previously <sup>1</sup>. We amplified the 1-1.5kb upstream and downstream homologous repair templates from the N2 genomic DNA and inserted them into pPD95.77 by In-Fusion Advantage PCR Cloning Kit (Clontech). The knock-in worms were examined by PCR and Sanger sequencing. Transgenic worms were generated by the germline microinjection of DNA plasmids or PCR products at 10 - 50 ng/μl. Our knock-in animals of ARX-2 and WSP-1A do not show any obvious abnormality in the overall development of *C. elegans*. The primers, plasmids, strains and PCR products were list in Tables S1-S3.

### **Dye-filling assay**

Young adult worms were washed and collected into M9 buffer, and incubated with 20 μg/ml of Dil or DiO solution for 30-60 min in dark at room temperature. The worms were transferred to NGM plates and scored for dye filling defective (dye) uptake 1 hr later.

### **Specimen preparation**

The young adult WT and the distal defective *wsp-1a* mutant animals were fixed in M9 solution containing 2.5% glutaraldehyde, 1% paraformaldehyde, and 0.1 M sucrose for 1 days at 4 °C. The samples were post-fixed for 1 hr on ice with 1.5% potassium ferrocyanide and 1% aqueous osmium tetroxide for 20 min followed by another 1hr of 1 % OsO<sub>4</sub> alone. They were stained en block in 1% uranyl acetate at 4 °C overnight, dehydrated with up-graded ethanol serials, and embedded in resin SPIPON 812.

### **TEM, FIB-SEM and image processing**

TEM experiments were performed according to standard procedures, as described in Schouteden, 2015 <sup>2</sup>. Briefly, ultrathin (~70 nm) sections were cut on Leica UC6



ultramicrotome and placed on formvar-coated copper grids and counterstained with uranyl acetate and lead citrate. Images were captured by FEI Tecnai Spirit 120 kV transmission electron microscope operated at 100 kV.

FIB-SEM experiments were performed as described previously with a few modifications<sup>3</sup>. For FIB-SEM, blocks were trimmed to expose the longitudinal head area. On Helios NanoLab 600i FIB-SEM (FEI), a layer of platinum about 1  $\mu\text{m}$  thick was deposited on a surface perpendicular to the block face to be imaged. The block face was imaged using an electron beam with 3 keV acceleration voltage, 3 nA current, and 3  $\mu\text{s}$ /pixel dwell time. After the block face was imaged, gallium ion beam with an acceleration voltage of 30 keV and a current of 3 nA was used to mill the 50 nm thick superficial layer from the block face for the next round of imaging and milling. After the entire volume was acquired, the images were imported into Amira software and aligned<sup>4</sup>. The sensory compartments were manually traced and annotated using Amira v5.2 software (<https://www.amira.com/>).

### **Live cell imaging**

Young adult worms were anesthetized with 0.2 mmol/L levamisole in M9 buffer, and were mounted on 3% agarose pads at 20 °C<sup>5</sup>. Our live cell imaging system includes an Axio Observer Z1 microscope (Carl Zeiss MicroImaging, Inc.) equipped with a 100 $\times$ , 1.45 N.A. objective or an Olympus IX83 microscope equipped with a 150 $\times$ , 1.45 N.A. oil objective, an EM CCD camera (Andor iXon+ DU-897D-C00-#BV-500), and a Sapphire CW CDRH USB Laser System with a spinning disk confocal scan head (Yokogawa CSU-X1 Spinning Disk Unit). Time-lapse images were acquired with an exposure time of 200 msec by  $\mu$ Manager software (<https://www.micro-manager.org/>) and processed and quantified by ImageJ software (<http://rsbweb.nih.gov/ij/>).

### **Quantifications and statistical analysis**

The Student's *t*-test was used to examine significant differences in the sensory compartment between WT and mutants as indicated in figure legends.

## Reference

- 1 Dickinson DJ, Ward JD, Reiner DJ, Goldstein B. Engineering the *Caenorhabditis elegans* genome using Cas9-triggered homologous recombination. *Nature methods* 2013; **10**:1028-1034.
- 2 Schouteden C, Serwas D, Palfy M, Dammermann A. The ciliary transition zone functions in cell adhesion but is dispensable for axoneme assembly in *C. elegans*. *The Journal of cell biology* 2015; **210**:35-44.
- 3 Knott G, Marchman H, Wall D, Lich B. Serial section scanning electron microscopy of adult brain tissue using focused ion beam milling. *The Journal of Neuroscience* 2008; **28**:2959-2964.
- 4 Pruggnaller S, Mayr M, Frangakis AS. A visualization and segmentation toolbox for electron microscopy. *Journal of structural biology* 2008; **164**:161-165.
- 5 Chai Y, Li W, Feng G, Yang Y, Wang X, Ou G. Live imaging of cellular dynamics during *Caenorhabditis elegans* postembryonic development. *Nature protocols* 2012; **7**:2090-2102.
- 6 Perkins LA, Hedgecock EM, Thomson JN, Culotti JG. Mutant sensory cilia in the nematode *Caenorhabditis elegans*. *Developmental biology* 1986; **117**:456-487.
